# Supplementary material
Source: ML conference proceedings conference paper supplement (https://proceedings.neurips.cc/paper_files/paper/2018/hash/73e5080f0f3804cb9cf470a8ce895dac-Abstract.html)
Supplement: Supplementary file [file 73e5080f0f3804cb9cf470a8ce895dac-Supplemental.zip]

## 7 Appendix

### 7.1 Architectures and optimization

We implement our models in PyTorch [18]. We use the same architectures and hyperparameters in all our experiments.

We train our models for 2300 epochs using Adam optimizer with  $\text{betas} = (0.9, 0.999)$ ,  $\text{eps} = 10^{-8}$  and initial  $lr = 10^{-3}/2$ . We use PyTorch’s learning rate scheduler MultiStepLR with  $\text{milestones} = \{3^i \mid i = 0, \dots, 6\}$  and  $\text{gamma} = 0.1^{1/7}$ . We use minibatches of size 64.

Our architectures consist of convolutional layers with ReLu activations which roughly follow that found in [14].

Our loss function is weighted as

$$\begin{aligned} & -\beta_1 \mathbb{E}_{q_\phi(\mathbf{z}, \mathbf{w} | \mathbf{x}, \mathbf{y})} [\log p_\theta(\mathbf{x} | \mathbf{w}, \mathbf{z})] + \beta_2 D_{KL}(q_\phi(\mathbf{w} | \mathbf{x}, \mathbf{y}) \parallel \log p(\mathbf{w} | \mathbf{y})) \\ & + \beta_3 D_{KL}(q_\phi(\mathbf{z} | \mathbf{x}, \mathbf{y}) \parallel p(\mathbf{z})) + \beta_4 \mathbb{E}_{q_\phi(\mathbf{z} | \mathbf{x}) \mathcal{D}(\mathbf{x})} \left[ \int_Y q_\delta(\mathbf{y} | \mathbf{z}) \log q_\delta(\mathbf{y} | \mathbf{z}) d\mathbf{y} \right] \\ & - \log p(\mathbf{y}) \\ & \beta_5 \mathbb{E}_{q(\mathbf{z} | \mathbf{x}) \mathcal{D}(\mathbf{x}, \mathbf{y})} [\log q_\delta(\mathbf{y} | \mathbf{z})]. \end{aligned}$$

We use the values  $\{\beta_1 = 20, \beta_2 = 1, \beta_3 = 0.2, \beta_4 = 10, \beta_5 = 1\}$ .

Our hyperparameters were determined by a grid search using both quantitative and qualitative analysis (see below) of models trained for 100,300, and 500 epochs on a validation set. Stopping time was determined similarly.

### 7.2 Additional results

|                      | anger         | disgust       | fear          | happy         | sad           | surprise      | neutral       | final         |
|----------------------|---------------|---------------|---------------|---------------|---------------|---------------|---------------|---------------|
| VAE                  | 12.61%        | 7.72%         | 2.50%         | 30.24%        | 5.65%         | 6.25%         | 68.57%        | 19.08%        |
| CondVAE              | 58.92%        | 66.98%        | 34.95%        | 91.19%        | 43.39%        | 53.36%        | 91.97%        | 62.97%        |
| CondVAE- <i>info</i> | 57.64%        | 64.79%        | 32.76%        | 92.68%        | 43.69%        | 52.36%        | 91.95%        | 62.27%        |
| CSVAE                | <b>79.04%</b> | <b>85.11%</b> | <b>53.50%</b> | <b>98.70%</b> | <b>47.09%</b> | <b>71.49%</b> | <b>98.70%</b> | <b>76.23%</b> |

Table 3: Accuracy of an expression classifier on images changed by each model. CSVAE shows best performance.

|                      | CelebA-Glasses |                |               | CelebA-FacialHair |               |               |
|----------------------|----------------|----------------|---------------|-------------------|---------------|---------------|
|                      | Glasses        | Neutral        | Final         | Facial Hair       | Neutral       | Final         |
| VAE                  | 5.04%          | 65.01%         | 25.03%        | 38.46%            | 61.17%        | 49.81%        |
| CondVAE              | <b>100.00%</b> | 88.13%         | 96.04%        | <b>100.00%</b>    | 77.86%        | 88.93%        |
| CondVAE- <i>info</i> | <b>100.00%</b> | 85.49%         | 95.16%        | 99.97%            | 76.10%        | 88.03%        |
| CSVAE                | 99.38%         | <b>100.00%</b> | <b>99.59%</b> | <b>100.00%</b>    | <b>95.50%</b> | <b>97.75%</b> |

Table 4: Classifier accuracy on the CelebA-Glasses (left) and CelebA-FacialHair (right) datasets when performing attribute transfer.

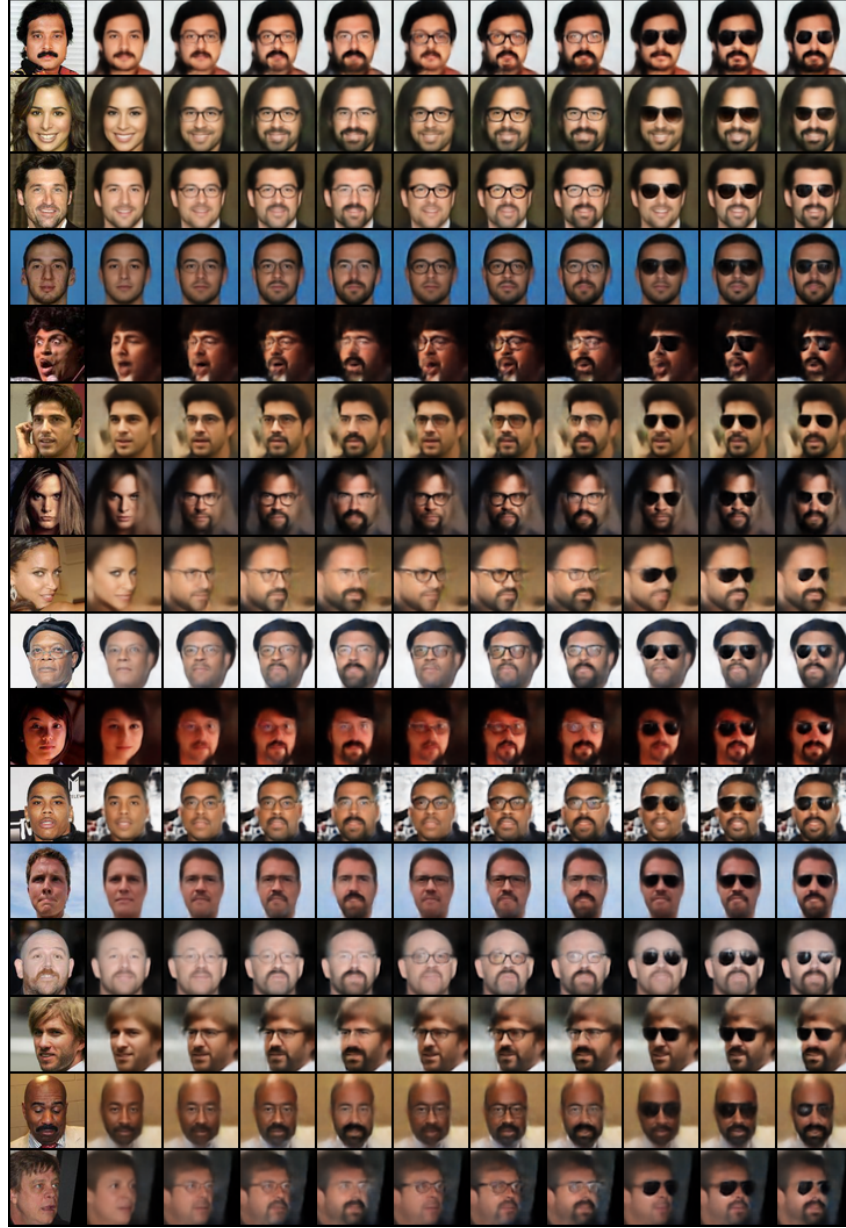

Figure 7: Additional attribute transfer results with a CSVAE trained on CelebA-GlassesFacialHair. From left to right: input image, reconstruction, Cartesian product of three representative glasses styles and facial hair styles.

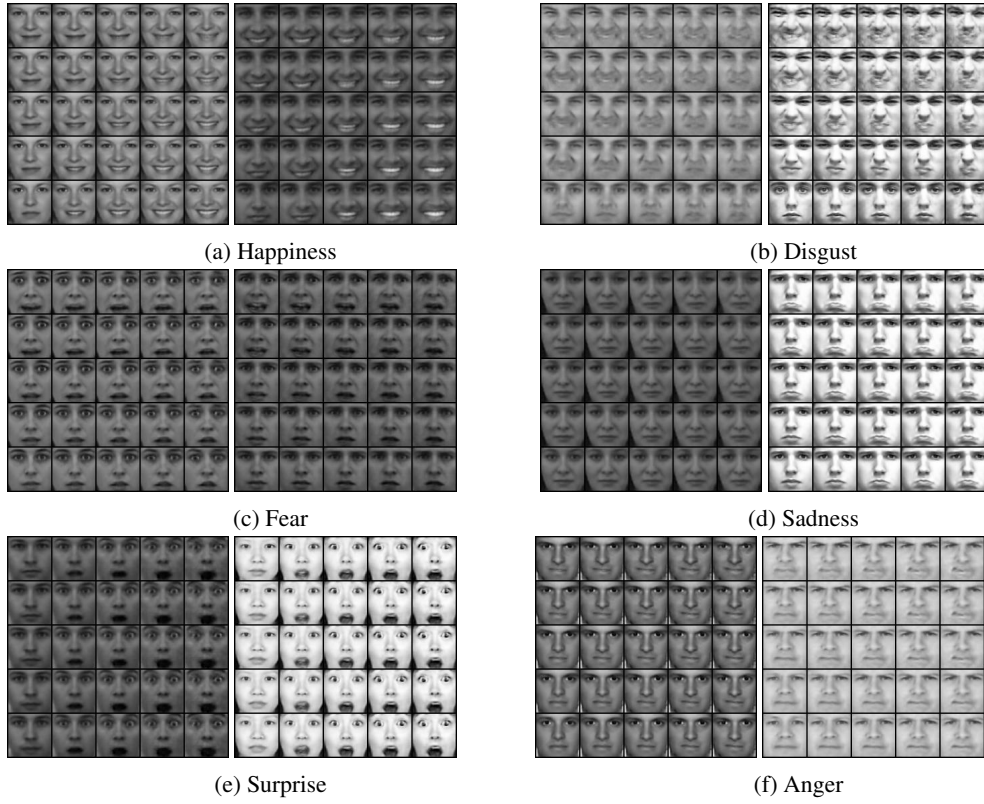

Figure 8: More results of the experiment presented in Figure 4 on TFD. We demonstrate manipulating each of the expressions in the dataset. The first three expressions display more 2-dimensional variation than the last three. This is likely due to the content of the dataset. A single model was used for all images.

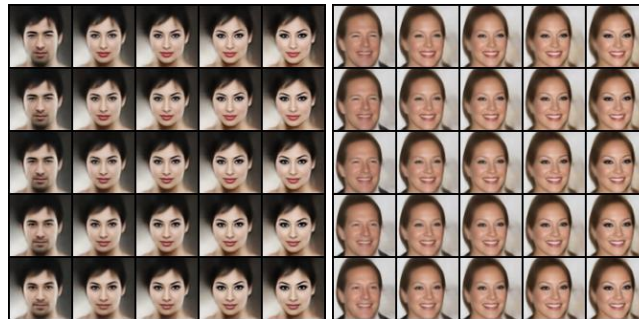

Figure 9: More results of the experiment presented in Figure 3 on a dataset with the heavy makeup attribute.

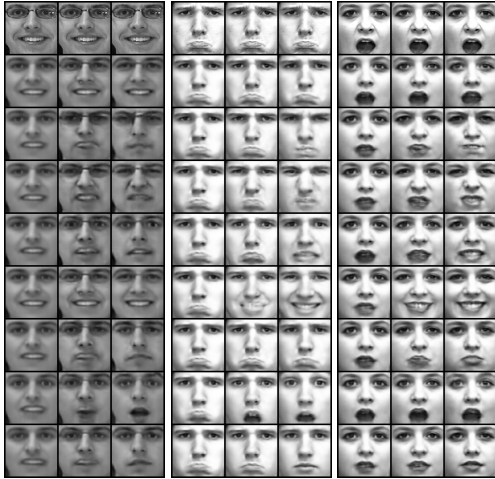

Figure 10: Comparisons of different models changing the expression of a face. The columns are left to right: VAE, CondVAE, CSVAE. The first row is the original, the second is a reconstruction. Each subsequent row is a different expression generated by the model.

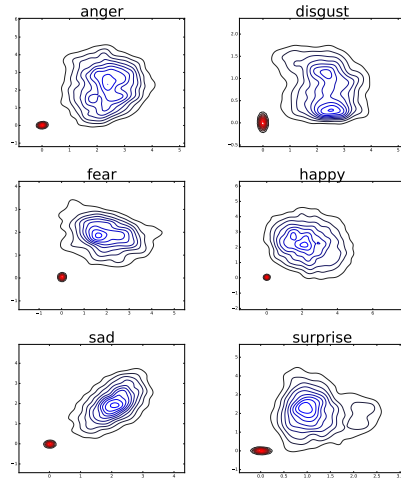

Figure 11: The distribution over  $W_i$  output by the model on the test set for each expression  $i$  in the order 0 = Anger, 1 = Disgust, 2 = Fear, 3 = Happy, 4 = Sad, 5 = Surprise.
